# Supplementary material for: Safety assessment of titanium dioxide (E171) as a food additive
Source: PubMed Central journal article supplement (PMC8101360; doi:10.2903/j.efsa.2021.6585), 2021-05-06
Supplement: EFS2-19-e06585-s007.pdf [file EFS2-19-e06585-s007.pdf]

## Appendix P - Genotoxicity studies submitted by Interested Business Operators

The evaluation of the studies was performed according the approach set in Appendix D

| Test system/<br>Test object                                                                                                          | Exposure conditions<br>(concentration/<br>duration<br>/metabolic activation                                                                                                                 | Information on the<br>characteristics of<br>the test substance                                                                                                                                                                                                                                              | Scoring for<br>nanoscale<br>considerations<br>(dispersion<br>and/or<br>confirmation of<br>internal<br>exposure),<br>assigned<br>according to<br>Appendix E | Result                                                                                                                                                                                                                                  | Reliability/<br>Comments                                                           | Relevance<br>of the<br>result | Reference                                                     |
|--------------------------------------------------------------------------------------------------------------------------------------|---------------------------------------------------------------------------------------------------------------------------------------------------------------------------------------------|-------------------------------------------------------------------------------------------------------------------------------------------------------------------------------------------------------------------------------------------------------------------------------------------------------------|------------------------------------------------------------------------------------------------------------------------------------------------------------|-----------------------------------------------------------------------------------------------------------------------------------------------------------------------------------------------------------------------------------------|------------------------------------------------------------------------------------|-------------------------------|---------------------------------------------------------------|
| Bacterial reverse mutation assay (Ames test) in <i>S. typhimurium</i> TA98, TA100, TA1535, TA1537 and <i>E. Coli</i> WP2 <i>uvrA</i> | Plate incorporation methodology;<br><br>Concentrations in the main test: 33.3, 100, 333, 1000, 3333 and 5000 µg/plate; ± S9<br><br>Vehicle: water<br>A confirmatory test was not conducted. | The tested material corresponds to a commercial brand of E 171 for which data were submitted during the assessment of the amendment of the EU specifications for E171 (sample E) (EFSA FAF Panel, 2019), and consists of constituent particles with a median diameter in the order of 100 nm. Purity 99.5%. | NSC: 3<br>Dispersion was not considered and no information on agglomeration level provided.                                                                | <b>Negative</b><br><br>Precipitate observed > 1000 µg/plate<br><br>No cytotoxicity observed.<br>Reduction in revertant count in TA1537 from 3333 µg/plate, at the same concentrations there was an increase of interfering particulate. | Reliability: 5<br><br>Bacterial systems are not suitable for testing nanomaterials | Low                           | BioReliance, 2020a.<br>Documentation provided to EFSA No. 14. |
| Mammalian Cell Micronucleus Assay                                                                                                    | HPBL were treated for 4 hours in the absence and presence of S9, and for                                                                                                                    | The tested material corresponds to a commercial brand of E 171 for which data                                                                                                                                                                                                                               | NSC: 3<br>Protocol for poorly soluble substances not                                                                                                       | <b>Inconclusive</b><br>(Negative without proof of internalisation)                                                                                                                                                                      | Reliability: 3                                                                     | Low                           | BioReliance, 2020b.                                           |

|                                                                                               |                                                                                                                                                                                                                                                                                                                                                                               |                                                                                                                                                                                                                                      |                                                                                                                                                     |                                                                                                                                                                                                                                    |                                                                                                   |  |                                              |
|-----------------------------------------------------------------------------------------------|-------------------------------------------------------------------------------------------------------------------------------------------------------------------------------------------------------------------------------------------------------------------------------------------------------------------------------------------------------------------------------|--------------------------------------------------------------------------------------------------------------------------------------------------------------------------------------------------------------------------------------|-----------------------------------------------------------------------------------------------------------------------------------------------------|------------------------------------------------------------------------------------------------------------------------------------------------------------------------------------------------------------------------------------|---------------------------------------------------------------------------------------------------|--|----------------------------------------------|
| <p>Human Peripheral Blood Lymphocytes (HPBL) from a healthy non-smoking female individual</p> | <p>24 hours in the absence of S9.<br/>0.3, 1, 2, 3, 10, and 30 µg/mL for all three exposure groups.</p> <p>0.3, 1, 10 and 30 µg/mL selected for the MN analysis</p> <p>Positive controls:<br/>-S9: Mitomycin C<br/>-S9: Vinblastine<br/>+S9: Cyclophosphamide</p> <p>CytoB at 6 µg/mL added after 4h in the 4h -S9 and +S9 tests and at the beginning in the 24h -S9 test</p> | <p>were submitted during the assessment of the amendment of the EU specifications for E171 (sample E) (EFSA FAF Panel, 2019), and consists of constituent particles with a median diameter in the order of 100 nm. Purity 99.5%.</p> | <p>accounting for the presence of nanoparticles. There is an indication that samples were collected for TEM analysis, but no data are reported.</p> | <p>Precipitation was observed at 2 µg/ml at the conclusion of the treatment period. No cytotoxicity was observed. CBPI levels for all concentrations at 4h -S9 exposure, are higher than CBPI for concurrent negative control.</p> | <p>Cellular uptake is not demonstrated. CytoB added at the beginning for the 24h -S9 protocol</p> |  | <p>Documentation provided to EFSA No. 15</p> |
|-----------------------------------------------------------------------------------------------|-------------------------------------------------------------------------------------------------------------------------------------------------------------------------------------------------------------------------------------------------------------------------------------------------------------------------------------------------------------------------------|--------------------------------------------------------------------------------------------------------------------------------------------------------------------------------------------------------------------------------------|-----------------------------------------------------------------------------------------------------------------------------------------------------|------------------------------------------------------------------------------------------------------------------------------------------------------------------------------------------------------------------------------------|---------------------------------------------------------------------------------------------------|--|----------------------------------------------|

CBPI: cytokinesis-block proliferation index, CytoB: Cytochalasin-B; NSC: Nanoscale considerations.
