# Supplementary material for: Safety assessment of titanium dioxide (E171) as a food additive
Source: PubMed Central journal article supplement (PMC8101360; doi:10.2903/j.efsa.2021.6585), 2021-05-06
Supplement: EFS2-19-e06585-s012.pdf [file EFS2-19-e06585-s012.pdf]

## Appendix O - *In vivo* genotoxicity study from OECD dossier (OECD, 2016)

The evaluation of the study has been performed according the approach set in Appendix D

| Test system/Test object                                                                                                                                                  | Dose/Route                                                                                                                                                                                                                                                                            | Information on the characteristics of the test substance | Scoring for nanoscale considerations (dispersion and/or confirmation of internal exposure), assigned according to Appendix E                          | Result                                                                                            | Reliability/Comments                                                                                             | Relevance of the result                                                         | Reference authors_year |
|--------------------------------------------------------------------------------------------------------------------------------------------------------------------------|---------------------------------------------------------------------------------------------------------------------------------------------------------------------------------------------------------------------------------------------------------------------------------------|----------------------------------------------------------|-------------------------------------------------------------------------------------------------------------------------------------------------------|---------------------------------------------------------------------------------------------------|------------------------------------------------------------------------------------------------------------------|---------------------------------------------------------------------------------|------------------------|
| Female Wistar rats<br><br>Investigation of DNA adducts in lung tissue after 2 years inhalation exposure in a carcinogenicity study. <sup>32</sup> P post-labelling assay | 7.5 mg/m <sup>3</sup> for the first 4 months, then dose was increased to 15 mg/m <sup>3</sup> for 4 months. Afterwards, dose was reduced to 10mg/m <sup>3</sup> (due to toxicity) for 16 months.<br><b>Inhalation</b> (whole body exposure chamber); 18h/day, 5 days/week for 2 years | TiO <sub>2</sub> NPs (P25), anatase/rutile, 15-24 nm     | Aerosol dispersion technique to generate TiO <sub>2</sub> aerosol<br><br>Dispersion not assessed as criteria are not applicable to inhalation studies | After 2 years exposure to TiO <sub>2</sub> NPs, the levels of lung DNA adducts were not increased | Reliability: 5<br><br>Reliability not evaluated as the study is considered not relevant for oral risk assessment | Low<br><br>Investigation on site of contact effects after inhalational exposure | Gallagher et al. 1994  |

The ccWG Genotoxicity noted that under the NANOGENOTOX project also *in vivo* studies were performed, however the provided information (Documentation provided to EFSA No. 9) was considered preliminary and not sufficient to evaluate the reliability and the relevance of these studies.
